# Supplementary material for: Sustainable synthesis of hierarchical MFI zeolite from mesoporous HMS and catalytic application
Source: Research Square preprint supplement (doi:10.21203/rs.3.rs-8692112/v1), 2026-02-06
Supplement: Supplementary file 1 [file 643f018ab3b66eb7e04e3a2f.docx]

**Sustainable synthesis of hierarchical MFI zeolite from mesoporous HMS and catalytic application**

Longyang Wang a, Zihao Yang a, Xin Wang a, Tong Wu a, Changzi Jin a*, Rui Wang b*, Heng Jiang a

aSchool of Petrochemical Engineering, bSchool of Science, Liaoning Petrochemical University, Fushun, 113001, China

E-mail address: jin_chz@163.com (Changzi Jin). wr_wrwr@163.com (Rui Wang)

Fig. S1 Small angle XRD patterns of (a) ca-HMS(DDA), (b) ca-HMS (HDA), (c) zeolite from ca-HMS(DDA) and (d) zeolite from ca-HMS(HDA)


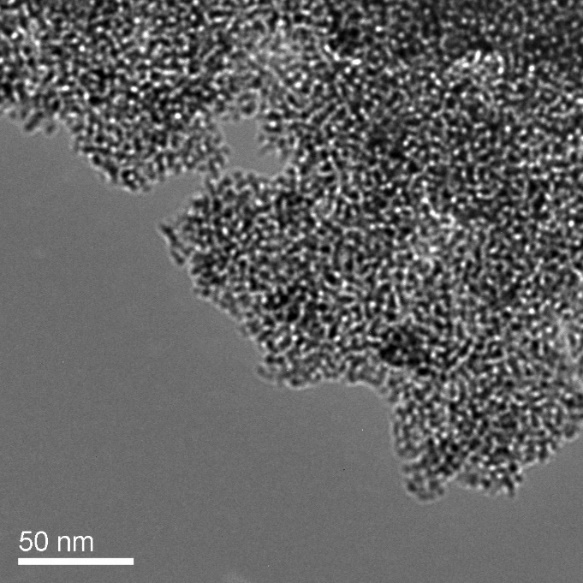

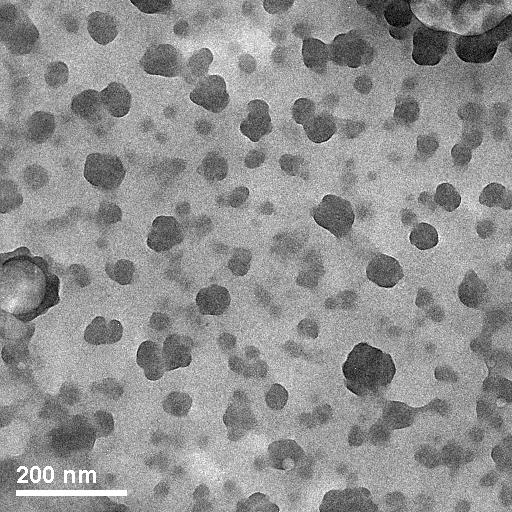


Fig. S2 TEM images of ca-HMS(DDA)

Fig. S3 N2 physical adsorption/desorption isotherms (a) and pore size distribution (b) of ca-HMS samples.

Fig. S4 N2 physical adsorption/desorption isotherms and pore size distribution (inset) of silica solid gel.
